# Supplementary material for: Development of a person-centered conceptual model of perceived fatigability
Source: Springer Nature journal article supplement (doi:10.1007/s11136-018-2093-z), 2019-01-02
Supplement: MOESM1 [file 16371810]

MI-FI Study: Fatigability Focus Group Guide

Opening Statements

Thank you for agreeing to participate in this research project. I’m Dr. Anna Kratz, a psychologist in the Department of Physical Medicine and Rehabilitation at the University of Michigan and I will be your facilitator for this discussion today. I would like to take a moment and introduce the other people in the room [facilitator introduces co-facilitator and others in the room].

Everyone is familiar with the concept of fatigue – feelings of physical or mental tiredness, exhaustion, lack of energy. Fatigue is a common symptom in many different illnesses, from the common cold to cancer. And, some people think that fatigue increases with age, though researchers are not sure about that.

Oftentimes doctors or researchers will ask a person about their fatigue as a way to get a sense of the person’s health or to see whether their treatment is working. They might ask a question like “on a scale of 0 to 10 (with one being no fatigue and 10 being the worst fatigue you could possibly imagine) how fatigued were you on average in the past week?” Although this is an important question, we don’t think this question really taps into how problematic fatigue may be for a person. Let me give you an example:

Let’s say you have two adults; both say they were “a 7 out of 10” on fatigue this past week. The first person leads a very active lifestyle – works at a mentally-challenging job, exercises every day, and is actively engaged in the community. The second person has a very inactive lifestyle – rarely leaves the home and spends most of the time resting or watching television. Although both of these people experienced the same level of fatigue in the past week, the amount of mental and physical activity over the same time period was vastly different. The first person tires out, but only after a great deal of activity. The second person tires out even though they have done very little.

These differences between the first and second person get at a new concept called fatigability. Fatigability is how easily a person fatigues, mentally or physically, as a result of activity. We have all experienced changes in our level of fatigability; for instance, when healthy, you may feel no fatigue going up a flight of stairs or reading a lengthy news story; but when sick with the flu, you may feel extremely fatigued after only a couple of steps and may lose concentration before finishing the first paragraph of the news story. It’s important for researchers and doctors to be able to measure fatigability so that they can get the full picture of what sorts of activities a person is able to do and the fatigue they experience as a result of those activities. The best way for us to better understand this concept is to talk with the people who experience different levels of fatigability and learn about their experiences.

So, we’ve asked you to meet with us here today in what researchers call a “focus group” to talk about fatigue and fatigability so that we can learn what people think or know about this topic. In a focus group it’s really important that you say what you think. There are no right or wrong answers. We want to know what *you* think. It’s important that people with different perspectives speak up. If you would like to add to an idea, or if you have an idea that’s different from someone else’s, feel free to jump in. You don’t need to wait for me to call on you to talk, but only one person should talk at a time. Your insights about how you experience fatigability in your daily life are very important. One of our goals with this project is to develop a new questionnaire that measures fatigability.

At the end of this session, we will show you an existing questionnaire about fatigability and get your thoughts and reactions about how we can improve upon it.

*Group Ground Rules:* We will be audio recording this session to be sure we don’t miss anything you say, but we won’t be keeping track of who said what, so anything you say is anonymous. That is, your comments will not be linked to your name. Please speak up and talk one at a time so we can hear you clearly when the recording is transcribed. We only have 90 minutes at most, so it will be my job to will keep us moving along. In focus groups we want the discussion to be among you, because it is your thoughts and opinions that we want to hear. We want you to talk with each other and express your experiences and opinions. My job as facilitator will be to keep the discussion moving along and to keep the discussion focused on topics we want to know about, so please don’t be offended if I redirect the discussion. Although I am the facilitator, I would like the interaction to flow among you without much input from me.

I. Introduction & Ice-Breaker

For example: *“Let’s go around the room and briefly introduce ourselves. In a few sentences, tell us your first name and why you decided to participate in the focus group.”*

II. Free List Exercise on Fatigability

Sample Questions:

- *How does fatigability relate to your day-to-day experiences?*
- *How would describe physical fatigability? What sorts of activities make you feel physically fatigued?*
- *How would describe mental fatigability? What sorts of activities make you feel mentally fatigued?*
- *How would you say mental and physical fatigability are related/not related?*
- *What kinds of things cause you to feel more fatigued?*
- *What kinds of things cause you to slow down or become less effective – either mentally or physically?*
- *Are there any activities that make you feel less fatigued?*
- *Are there any things or activities that give you greater endurance? Things that make you feel less fatigued when you are active?*
- *How has your level of fatigability changed over time? As you’ve aged? Since your MS/FM diagnosis?*

Probes:

- *Physical activities (low intensity, high intensity, specific types of activities)?*
- *Social interactions (positive interactions, negative, intense interactions? In person or distance/online)?*
- *Cognitive/Mental activities (enjoyable like reading a book or aversive like doing taxes)?*
- *Emotions – how do emotional states relate to fatigability?*
- *Self-management – how do you manage yourself in terms of activities that you expect will be fatiguing?*
- *Would you say you are more mentally or physically fatigable? Why?*

III. Feedback on Existing Fatigability and Fatigue Impact Measures

After adequate discussion, the facilitator will ask the participants to complete an existing fatigability measure, the Pittsburgh Fatigability Scale (PFS), answering the questions to reflect their true experience. After completing the measures, participants will be asked to indicate the appropriateness and importance of items, and will be instructed to generate any items they feel are “missing”. Participants will be asked to list any domains of fatigability that they feel were not adequately covered in the previous discussion. Facilitators will probe the group as to their opinions on how best to structure the survey (referent time frame, response scale, item wording, etc.).

The participants will then be given a fatigue survey and asked to answer the questions to reflect their experience. After completing the measures, participants will be asked to reflect on whether this measure seems to be asking them about a different aspect of their fatigue experience than the PFS.

IV. Closure & Surveys

*“Did these exercises bring to mind any other issues that we haven’t talked about before?”*

*“Thinking back to our discussion, is there anything else that you would like to comment on now?”*

*“Thank you again for your participation. Your input is invaluable because no one else can tell us what issues are most important for those who experience bothersome fatigability. The fatigability questionnaire that we are creating will be very important in the improving the quality of life of individuals with fatigue and high levels of fatigability. Now, we have set aside some time to complete a survey battery”*

[administer survey battery]
